# Supplementary material for: One-Pot Synthesis of Alkyl Functionalized Reduced Graphene Oxide Nanocomposites as the Lubrication Additive Enabling Enhanced Tribological Performance
Source: MDPI journal article supplement (doi:10.3390/molecules29092004), 2024-04-26
Supplement: s1 [file s1]

---

## **Supporting Information**

### **One-Pot Synthesis of Alkyl Functionalized Reduced Graphene Oxide Nanocomposites as the Lubrication Additive Enabling Enhanced Tribological Performance**

Guangfa Zhang <sup>1,\*</sup>, Chao Zhu <sup>1</sup>, Yehai Yan <sup>1</sup>, Jian Cui <sup>1</sup> and Jingxian Jiang <sup>2,\*</sup>

<sup>1</sup> Key Laboratory of Rubber-Plastics, Ministry of Education, Shandong Provincial Key Laboratory of Rubber-Plastics, School of Polymer Science and Engineering, Qingdao University of Science and Technology, Qingdao 266042, China; zhu22chao@qust.edu.cn (C.Z.); yh2223yan@qust.edu.cn (Y.Y.); jian2223cui@qust.edu.cn (J.C.)

<sup>2</sup> School of Chemical and Environmental Engineering, Shanghai Institute of Technology, Shanghai 201418, China

\* Correspondence: gfzhang@qust.edu.cn (G.Z.); jxjiang@sjtu.edu.cn (J.J.)

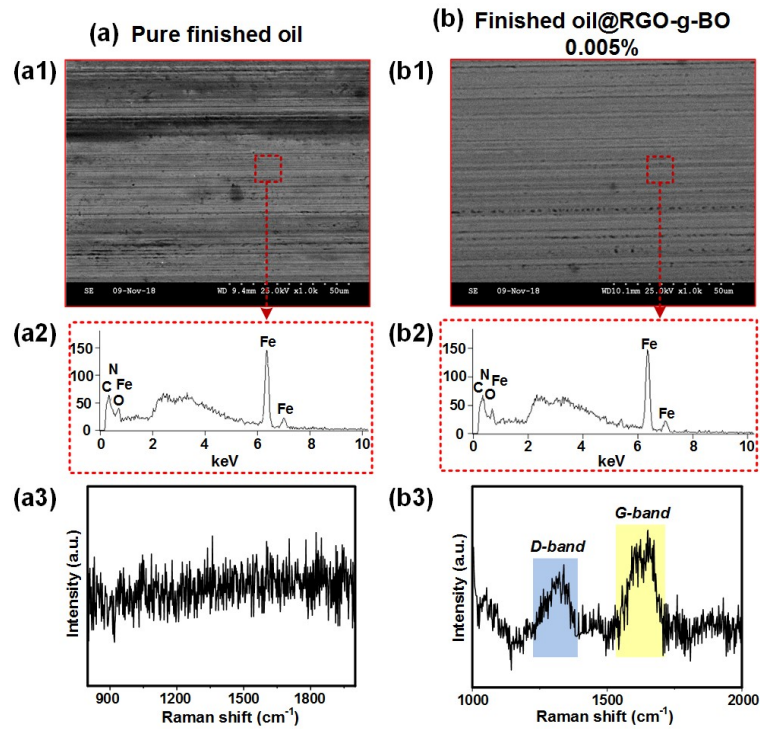

**Figure S1.** SEM images, energy dispersion X-ray analyses (EDX), and Raman spectra of the wear scars on the steel discs after the friction tests lubricated with the pure finished oil (**a**, **a1-a3**) and finished oil added with 0.005 wt% of RGO-g-BO (**b**, **b1-b3**).
